# Supplementary material for: Inhibitory Activity of (+)-Usnic Acid against Non-Small Cell Lung Cancer Cell Motility
Source: PubMed Central journal article supplement (PMC4708991; doi:10.1371/journal.pone.0146575), 2016-01-11
Supplement: pone.0146575.s001.pdf [file pone.0146575.s001.pdf]

## **Supplementary Material**

**Figure A.** LC-MS Analysis of samples used in this study

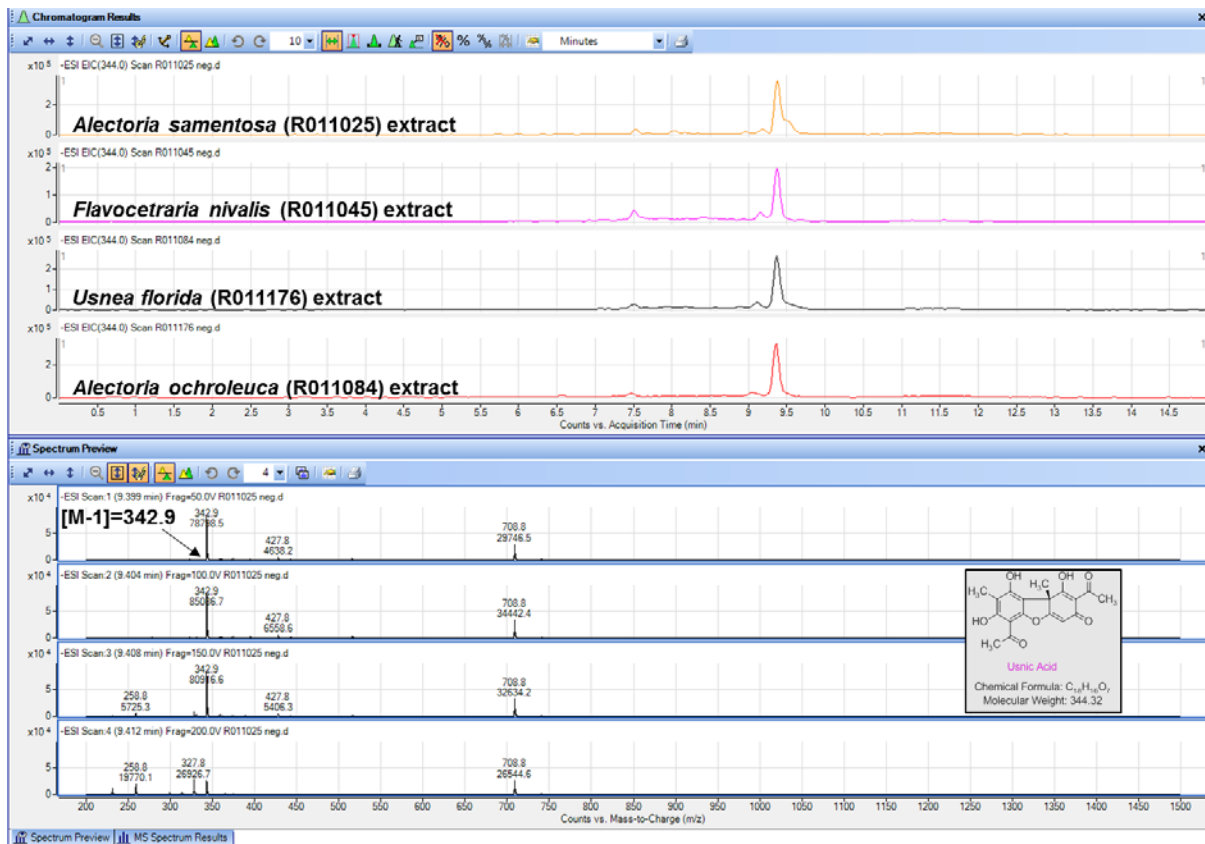

**Figure B.** Optical activity Analysis of samples used in this study.

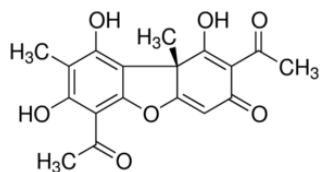

Reference data for optical activity of (+)-Usnic acid  
 $[\alpha]_{25/D} = +488^\circ$ ,  $c = 0.7\%$  in chloroform

| Collection No. | Samples                              | Optical activity                                            |                                              |
|----------------|--------------------------------------|-------------------------------------------------------------|----------------------------------------------|
|                |                                      | Experimental Results                                        | Reported usnic acid status in lichen species |
| -              | (+)-Usnic acid (Sigma-Aldrich)       | $[\alpha]_{24.6} = +467^\circ$ (c 1.7, CHCl <sub>3</sub> )  | +                                            |
| R011025        | <i>Alectoria samentosa</i> extract   | $[\alpha]_{25.0} = -345^\circ$ (c 0.65, CHCl <sub>3</sub> ) | -                                            |
| R011045        | <i>Flavocetraria nivalis</i> extract | $[\alpha]_{24.9} = -232^\circ$ (c 1.42, CHCl <sub>3</sub> ) | ±                                            |
| R011176        | <i>Usnea florida</i> extract         | $[\alpha]_{24.9} = +107^\circ$ (c 1.25, CHCl <sub>3</sub> ) | +                                            |
| R011084        | <i>Alectoria ochroleuca</i> extract  | $[\alpha]_{24.9} = -438^\circ$ (c 1.25, CHCl <sub>3</sub> ) | -                                            |
